## Zebrafish Lmx1b.1 and Lmx1b.2 are required for maintenance of the isthmic organizer

F. Patrick O'Hara, Ernestine Beck, Lauren K. Barr, Lily L. Wong, Daniel S. Kessler and Robert D. Riddle *Development* **132**, 3163-3173.

An error in Figure 1 of the article was not corrected before going to press. The sequence of Lmx1b.1 in Fig. 1A has a number of mistakes and, as a result, one entry of the matrix in Fig. 1B is also incorrect, as is the statement about sequence identity in the text on p. 3165. Zebrafish Lmx1b.1 and Lmx1b.2 share 81% identity, and not 77% identity as previously stated.

The correct figure is printed below.

The authors apologise to readers for these mistakes.

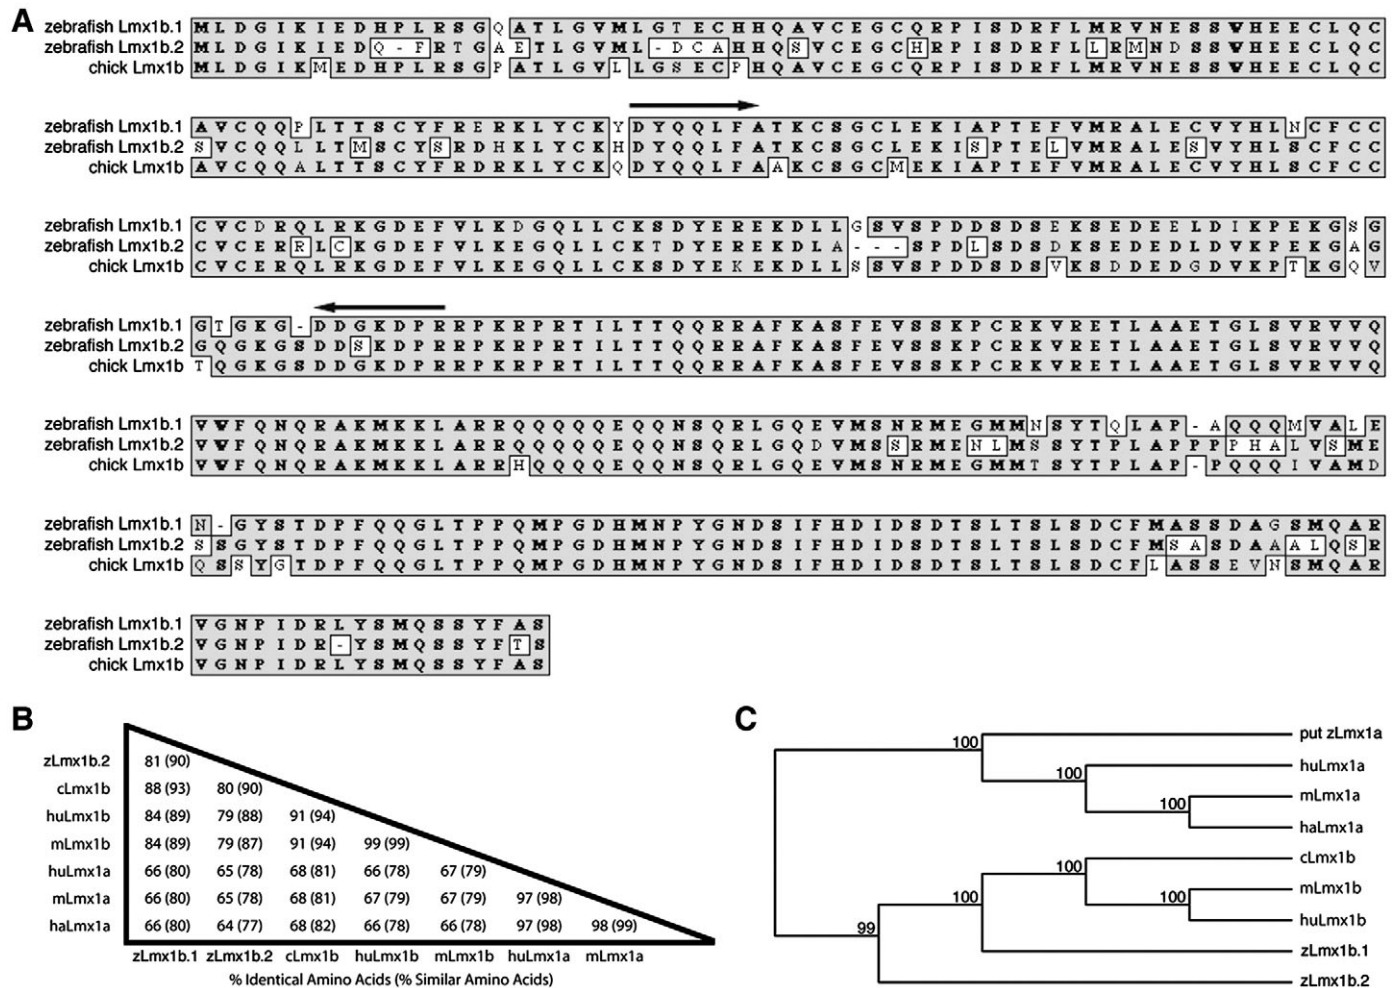

Source: https://cob.silverchair.com/dev/article-pdf/132/15/3574/1467738/3574.pdf
